1 **Transcriptome and Chromatin Landscape of iNKT cells are Shaped by Subset**

2 **Differentiation and Antigen Exposure**

3 (21/130)

4

5 Mallory Paynich Murray<sup>1#</sup>, Isaac Engel<sup>1#</sup>, Gregory Seumois<sup>1#</sup>, Sara Herrera de la Mata<sup>1</sup>,

6 Sandy Lucette Rosales<sup>1</sup>, Ashu Sethi<sup>1</sup>, Ashmitaa Logandha Ramamoorthy Premlal<sup>1</sup>,

7 Goo-Young Seo<sup>1</sup>, Jason Greenbaum<sup>1</sup>, Pandurangan Vijayanand<sup>1,2,3</sup>, and James P.

8 Scott-Browne<sup>1,4\*</sup> and Mitchell Kronenberg<sup>1,5\*</sup>

9 #Co-first authors

10 \*Co-Corresponding authors

11

12 **Affiliations:**

13 1 La Jolla Institute for Immunology, La Jolla, CA, USA

14 2 University of Southampton, Faculty of Medicine, Southampton, UK

15 3 Department of Medicine, University of California San Diego, La Jolla, CA, USA

16 4 Department of Biomedical Research, National Jewish Health, Denver, CO, USA

17 5 Division of Biological Sciences, University of California San Diego, La Jolla, CA, USA

18

19

20

21

22

23

24 **Abstract**

25 Invariant natural killer T cells (iNKT cells) differentiate into thymic and peripheral NKT1,  
26 NKT2 and NKT17 subsets. We determined if the gene programs associated with these  
27 thymic subsets were maintained in peripheral sites, the influence of tissue location, and  
28 if there were large-scale changes after antigen exposure. RNA-seq and ATAC-seq  
29 analyses showed that iNKT cells in any subset were similar, regardless of tissue  
30 location. Lung iNKT cell subsets possessed the most distinct location-specific features,  
31 shared with other innate lymphocytes in the lung, possibly consistent with increased  
32 activation. After antigenic stimulation, iNKT cells underwent chromatin and transcription  
33 changes leading to two populations: one similar to follicular helper T cells and the other  
34 like NK or effector cells. Phenotypic analysis indicated these changes were observed  
35 long-term, suggesting that iNKT cells gene programs are not fixed, but they are capable  
36 of chromatin remodeling after antigen to give rise to several new subsets.

37

38

39

40

41

## 42 **Introduction**

43 Invariant Natural Killer T (iNKT) cells are considered to be an innate-like T lymphocyte  
44 population that can initiate or inhibit immune responses, depending on the context.  
45 Following activation, iNKT cells rapidly produce copious amounts of cytokines, similar to  
46 other innate-like lymphocytes<sup>1</sup>. iNKT cells express an invariant TCR $\alpha$  chain comprised  
47 of a V $\alpha$ 14-J $\alpha$ 18 (*Trav11-Traj18*) rearrangement in mice, with a conserved  
48 rearrangement in humans and many other mammals. These cells are activated by  
49 either self or microbial glycolipid antigens, presented by CD1d, a non-classical MHC  
50 class I molecule<sup>2</sup>.

51  
52 In the thymus, iNKT cells differentiate into three effector cell subsets, NKT1, NKT2, and  
53 NKT17, without exposure to exogenous antigen. Their effector functions and cytokine  
54 profiles resemble T<sub>H</sub>1, T<sub>H</sub>2, and T<sub>H</sub>17 CD4<sup>+</sup> T cells and subsets of other lymphocytes,  
55 including ILC, mucosal associated invariant T (MAIT) cells and  $\gamma\delta$  T cells<sup>3, 4, 5</sup>. Within  
56 the thymus, these iNKT cell subsets have highly divergent epigenetic landscapes and  
57 transcriptional programs<sup>6, 7, 8</sup>. Remarkably, several hundred genes are differentially  
58 expressed between thymic iNKT cell subsets, despite their similar specificity and  
59 despite sharing a distinct positive selection pathway<sup>9</sup>. Evidence suggests that some  
60 iNKT cells are long-term thymic residents, and these resident cells may contribute to  
61 thymic homeostasis<sup>6</sup>. Following egress from the thymus, iNKT cells localize to tissues  
62 throughout the body and the majority of peripheral iNKT cells do not recirculate<sup>10, 11</sup>.

63  
64 Although divergent thymic iNKT cell subsets have been identified, their relationship to

65 the corresponding peripheral iNKT cell subsets has not been assessed. Also, the  
66 impact of tissue localization on gene expression programs remains incompletely  
67 understood. To address these issues, we compared transcriptomic and epigenomic  
68 data of iNKT cells from the thymus to several peripheral sites. Similar methods were  
69 used to track changes in these cells after antigen exposure. Our genome-wide analysis  
70 of the transcriptome and epigenome of iNKT cell subsets provides insights into the  
71 stability and plasticity of the chromatin landscapes that are potentially initiated in the  
72 thymus.

73

74

## 75 **Results**

76

### 77 *Divergent chromatin landscape of thymic iNKT cell subsets*

78 Previously, we showed that thymic iNKT cell subsets possess highly divergent  
79 transcriptomes<sup>8</sup>. Similar results were obtained by others<sup>7, 11, 12</sup>. Further, we  
80 demonstrated by genome-wide analysis of H3K27 acetylation modification that there  
81 were significant differences in enhancer marks between the thymic iNKT cell subsets<sup>8</sup>.  
82 Because the epigenetic landscape of a cell population is more stable than the  
83 transcriptome, we analyzed the epigenetic landscape of thymic iNKT cell subsets more  
84 broadly with the assay for transposase-accessible chromatin using sequencing (ATAC-  
85 seq)<sup>13</sup>. The thymic iNKT cell subsets were sorted based on expression of surface  
86 proteins and validated by transcription factor staining (Supplementary Fig. 1a, 1b).  
87 Based on our previous RNA-seq analysis of thymic iNKT cell subsets, we excluded a  
88 population of CD1d-tetramer<sup>+</sup> cells with an intermediate phenotype, ICOS<sup>high</sup> or IL17RB<sup>+</sup>  
89 cells that express CXCR3 or CD122, to obtain more purified subsets (Supplementary  
90 Fig. 1c). Expression of *Rorc* and *Tbx21* transcripts by each iNKT cell subset in multiple  
91 tissue tissues further demonstrates sorting efficiency; *Rorc* transcripts are only  
92 expressed in NKT17 cells, whereas *Tbx21* transcripts are predominately expressed in  
93 NKT1 cells (Supplementary Fig. 1d).

94

95 Consistent with previous results, we found that the profiles of accessible chromatin in  
96 iNKT cell thymic subsets were strikingly divergent, with between approximately 5,000-  
97 7,500 differentially accessible regions of chromatin (Fig. 1a). For comparison, naïve

98 versus memory CD8<sup>+</sup> T cells have approximately 5,700 differentially accessible regions  
99 of chromatin<sup>14, 15</sup>. Fig. 1b highlights the results from some key cytokine and  
100 transcription factor gene loci. For example, there was a higher ATAC-seq signal at the  
101 *Ifng* locus in thymic in NKT1 cells (Fig. 1b). Although some signal at several peaks also  
102 was apparent in NKT2 cells, no accessibility was detected at a proximal enhancer 5 kb  
103 upstream of the TSS (vertical grey bar) required for *Ifng* transcription (Fig. 1b)<sup>16</sup>. As  
104 expected, we found the *Il17a* locus was most accessible in NKT17 cells. The *Il4* and  
105 *Il13* loci were open in both NKT2 and NKT1 cells, likely reflecting the ability of NKT1  
106 cells to produce some Th2 cytokines after strong activation (Fig. 1b). Similarly, for  
107 transcription factors that drive the expression of key cytokines, the *Tbx21* locus  
108 encoding T-bet was more accessible in NKT1 cells and accessibility of *Rorc* was  
109 increased in NKT17 cells (Fig. 1b, right). *Zbtb16* encoding PLZF, a transcription factor  
110 required for the generation of all iNKT cells<sup>9</sup>, was accessible in all subsets, although  
111 mRNA and protein expression (Supplementary Fig. 1b) were higher in NKT2  
112 thymocytes.

113  
114 We partitioned all differentially accessible regions between thymic subsets (Fig. 1a) into  
115 eight groups with *k*-means clustering to identify potential regulatory elements with  
116 similar changes in ATAC-seq signal. We then examined the degree to which the  
117 regions in each group were accessible in the different thymocyte iNKT cell subsets (Fig.  
118 1c). Regions in clusters 1-3 had the highest signal in NKT1 cells, while clusters 4-5 and  
119 6-8 had the highest signal in NKT2 and NKT17 cells, respectively. To associate the  
120 changes in regulatory element accessibility with transcription factors, we determined the

121 enrichment of known motifs associated with DNA binding proteins. Within clusters 1-3,  
122 typical of NKT1 cells, accessible regions frequently contained Tbox motifs, and to a  
123 lesser extent Runt and Et1 motifs. HMG box protein motifs, associated with Tcf1 and  
124 Lef1, were enriched in NKT2 thymocytes along with some enrichment for zinc finger and  
125 RHD domain motifs, which include Egr1 and Nfat motifs, respectively. Expression of  
126 Tcf1 (encoded by *Tcf7*) is enriched in NKT2 cells and required for iNKT cell  
127 development<sup>17</sup>. Additionally, Lef1 is required for iNKT cell expansion and NKT  
128 differentiation, independent of Tcf1<sup>18</sup>. Regions accessible in NKT17 cells were enriched  
129 for consensus motifs of nuclear receptors, which can include Rorc and Revrb (Fig. 1d).

130

### 131 *iNKT cell subsets in different sites are similar*

132 To understand the degree to which the gene programs associated with thymic subsets  
133 were also present in the periphery, and to assess the impact of tissue localization on  
134 chromatin accessibility and the transcriptome, we compared sorted iNKT cell subsets  
135 from thymus to those in spleen, liver and lung by both RNA-seq and ATAC-seq  
136 analysis. Previous work showed that NKT1 cells were the predominant iNKT cell  
137 population in C57BL/6J mice, comprising the majority in all the tissue sites analyzed<sup>6</sup>.  
138 NKT17 cells preferentially localized to the lung, lymph nodes and skin, and NKT2 cells  
139 were more abundant in the spleen and mesenteric lymph nodes<sup>6</sup>. Because of the very  
140 low cell numbers, NKT2 and NKT17 cells from liver were not analyzed. Although we  
141 used a different RNA-seq technology allowing for greater sequencing depth<sup>19</sup>, we found  
142 exceedingly similar gene expression profiles in thymic NKT1, NKT2 and NKT17  
143 thymocytes compared to the previous study<sup>8</sup> (Supplementary Fig. 2). Based on bulk

144 RNA-seq analysis, we observed that, as in the thymus, iNKT cell subsets within a given  
145 tissue were distinct from one another (Supplementary Fig. 2). Similarly, the chromatin  
146 accessibility profiles of iNKT subsets from spleen showed a divergent pattern of  
147 accessible regions (Fig. 2a). Although splenic NKT2 and NKT17 cells were more  
148 similar to one another than their thymic counterparts, there remained more than 3,500  
149 differentially accessible loci (Fig. 2a).

150  
151 In comparing thymic iNKT cell subsets with their peripheral counterparts, we found  
152 smaller differences related to the tissue location compared to differences that were  
153 associated with the subset identity. For example, comparing peripheral NKT1 to thymic  
154 NKT1 cells, we found less than 1,000 differentially accessible chromatin regions (data  
155 not shown). Similarly, we observed relatively few differences in accessible chromatin  
156 regions comparing NKT1 cells between different peripheral tissues (Fig. 2b). Similar  
157 results were obtained from analyzing chromatin accessibility in NKT2 and NKT17 cells  
158 from different tissues. Principal component analyses (PCA) of the ATAC-seq data  
159 revealed the strong influence of subset identity (Fig. 2c). A similar conclusion was  
160 obtained for the RNA-seq data, although we did find some separation based on tissue  
161 (Fig. 2d). These data are consistent with a model in which the chromatin accessibility  
162 patterns set up for iNKT cells in the thymus largely carry over into the periphery, where  
163 iNKT cell subset transcriptomes exhibit a high degree of similarity to thymic  
164 counterparts.

165



166 Despite the overall similarity between the thymus and peripheral tissues, there are  
167 transcripts that were enriched specifically in a given thymic subset compared to the  
168 same subset in each peripheral site, including *Egr2* and *Tox* (Fig. 2e). These  
169 transcription factors are required for the early stages of iNKT cell differentiation<sup>20, 21</sup>, so-  
170 called NKT0 cells, and therefore this may reflect residual expression of these genes in  
171 mature thymic iNKT cell subsets, long-lived in the thymus. Some transcripts were the  
172 converse, enriched in all or several peripheral tissues compared to thymus, without  
173 subset restriction. These include *Art2* and *P2rx7*, previously reported to be increased in  
174 total populations of peripheral iNKT cells<sup>22</sup>, which make cells sensitive to NAD-induced  
175 cell death, and *Osgin1*, identified as a growth inhibitory protein in other contexts<sup>23</sup>. The  
176 expression of these genes might reflect the need for brakes on the expansion and  
177 function of potentially autoreactive iNKT cells<sup>24</sup>. Also enriched in all sites in peripheral  
178 iNKT cells were *Tspan13*, and *Klf3*, whose expression was increased in memory CD8<sup>+</sup>  
179 T cells<sup>25</sup>.

180

### 181 *Identification of a gene expression signature in lung*

182 Although the iNKT cell subset is a predominant factor driving genomic differences, lung  
183 iNKT cells shared common features that distinguished them from their counterparts in  
184 the other locations. This was revealed by PC2 of the RNA-seq data (Fig. 2d), or PC3  
185 analysis of the ATAC-seq data (Fig. 3a). Transcripts encoding AP-1 and other bZIP  
186 family members, as well as some members of the NF- $\kappa$ B family were enriched in all  
187 lung iNKT cell subsets, as were transcripts encoding CTLA-4, CD69 and *Nr4a1*  
188 encoding Nur77 (Fig. 3b and Supplementary Fig. 3). Furthermore, regions more

189 accessible in lung iNKT cells were enriched for bZIP motifs, which are associated with  
190 the transcription factors Ap1 and Atf, as well as RHD motifs, which can include NF $\kappa$ B-  
191 p65 binding sites (Fig. 3c). Together these data are consistent with tissue-residency or  
192 increased activation of lung iNKT cells, and indeed, we found a subpopulation of lung  
193 iNKT cells that expressed CTLA-4 by flow cytometry (Fig. 3d). To ascertain that the  
194 signature in lung iNKT cells could not be attributed to infection or inflammation in a  
195 single mouse, we sorted iNKT cell subsets from individual mice obtained only one week  
196 earlier from a commercial supplier and performed RNA-seq. We found a similar lung  
197 gene expression signature in each individual (Supplementary Fig. 3).

198  
199 Cells within the lung are exposed to a diverse environment of environmental and  
200 microbial antigens, as well as differences in oxygen. We next asked if iNKT cells from  
201 another antigen-rich site, the small intestine, displayed a similar increase in CTLA-4  
202 expression. We found that total iNKT cells from the small intestinal lamina propria (SI-  
203 LPL) express CTLA-4 similarly to lung iNKT cells, whereas splenic iNKT cells do not  
204 (Fig. 3e). These data suggest antigen-rich environments may imprint the lung activation  
205 signature.

206  
207 Other innate or innate-like lymphocyte populations are found in lung, including  $\gamma\delta$  T  
208 cells, MAIT cells, ILC and NK cells, as well as mainstream resident lymphocytes and  
209 some circulating cells. We tested if the lung activation signature of iNKT cells extended  
210 to several other lung populations. Therefore, we performed ATAC-seq and RNA-seq  
211 analyses on sorted  $\gamma\delta$  T cells, NK cells, as well as naïve CD4<sup>+</sup> T cells from the lung and

212 spleen. Lung  $\gamma\delta$  T cells and NK cells displayed the lung signature based on increased  
213 chromatin accessibility in regions enriched for bZIP and RHD motifs (Fig. 4a), with  $\gamma\delta$  T  
214 cells having accessibility in regions enriched for nuclear receptor motifs, which can  
215 include ROR $\gamma$ t binding sites, while NK cells were enriched for T-box motifs. Lung CD4<sup>+</sup>  
216 T cells had a different pattern from the other cell types, but with some increased signal  
217 at regions containing bZIP (ATF) and RHD (NF- $\kappa$ B-p65) motifs (Fig. 4a). PCA analysis  
218 of the RNA-seq data, which included total iNKT cells from spleen or lung, showed  
219 separation of each lung cell type, including CD4<sup>+</sup> T cells, from the corresponding cell  
220 type in spleen (Fig. 4b). Further, we found increased expression of the iNKT cell lung  
221 signature genes, listed in Supplementary Fig. 3, in lung  $\gamma\delta$  T cells, and NK cells  
222 compared to the corresponding splenic populations (Fig. 4c). The transcriptome of lung  
223 CD4<sup>+</sup> T cells was more divergent, but still had some features in common with the lung-  
224 resident innate or innate-like lymphocyte populations (Fig. 4c). This is illustrated in Fig.  
225 4d, which shows that expression of *Fosl2*, *Bhlhe40* and *Tnfrsf3* was higher in all cell  
226 types from the lung. Gene set enrichment analysis (GSEA) pre-ranked analysis  
227 comparing each cell type from the lung versus spleen using the iNKT cell lung signature  
228 further demonstrated the strong enrichment of the lung signature in each cell type (Fig.  
229 4e).

230

### 231 *Epigenomic and transcriptomic changes following antigen challenge*

232 A unifying hypothesis based on these data is that iNKT cell subsets are formed in the  
233 thymus and seed peripheral tissues with fixed functions and relatively minor impacts to  
234 their chromatin landscape and transcriptomic profiles, with the partial exception of those

235 in the lung. To test this, we determined if these profiles remained after a strong  
236 antigenic challenge in total splenic iNKT cells, which are mostly NKT1 cells. To  
237 examine how the chromatin landscape and transcriptome of iNKT cells was altered in  
238 response to antigen, we injected mice with  $\alpha$ GalCer and harvested the spleen 6 days  
239 later. It has been reported that following exposure to the potent glycolipid antigen  $\alpha$ -  
240 galactosyl ceramide ( $\alpha$ GalCer), some iNKT cells display a T follicular helper cell ( $T_{FH}$ )-  
241 like phenotype, with increased expression of CXCR5, PD-1, and BCL6 (Supplementary  
242 Fig. 4a, 4b). These so-called  $NKT_{FH}$  cells produce IL-21, and localize to germinal  
243 centers<sup>26</sup>, and may play a role in early germinal center formation<sup>27</sup>, but their gene  
244 expression programs had not been elucidated. Putative  $NKT_{FH}$  ( $\alpha$ GalCer loaded CD1d  
245 tetramer<sup>+</sup>CXCR5<sup>+</sup>PD-1<sup>+</sup>) and the remaining population of iNKT cells from antigen-  
246 injected mice (CXCR5<sup>-</sup>PD-1<sup>-</sup> or NKT non-FH) cells were sorted and analyzed by ATAC-  
247 seq and RNA-seq. Of note, NKT1, NKT2 and NKT17 cells as described above are not  
248 identifiable 6 days following  $\alpha$ GalCer challenge and therefore were not analyzed. As  
249 shown in Fig. 5a, accessible regions of chromatin were exceptionally different  
250 comparing  $NKT_{FH}$  and the antigen-exposed non-FH cells, which we refer to as iNKT cell  
251 effectors ( $NKT_{eff}$ ). Chromatin accessibility regions in  $NKT_{FH}$  were also very different  
252 from the NKT1, NKT2 and NKT17 subsets in the spleen from uninjected mice, most  
253 different from NKT17 cells (Fig. 5a, left). There was increased chromatin accessibility in  
254  $NKT_{FH}$  in the *Ii21* locus and the *Pdcd1* locus encoding PD-1 in  $NKT_{FH}$  cells (Fig. 5b),  
255 reflecting a  $T_{FH}$  state. The accessible regions of chromatin within  $NKT_{eff}$  also greatly  
256 varied when compared to the iNKT cell subsets from unchallenged mice but were most

257 similar to NKT1 cells (Fig. 5a, right). These data suggest that most of the splenic iNKT  
258 cells were exposed to antigen, including those that did not become NKT<sub>FH</sub>.

259

260 We partitioned all differentially accessible regions between NKT<sub>FH</sub> and NKT<sub>eff</sub> cells and  
261 splenic iNKT cell subsets from unimmunized mice into ten groups with *k*-means

262 clustering to identify regions with similar changes in ATAC-seq signal. As above, we

263 examined the degree to which the regions in each group were differentially accessible in

264 iNKT cell populations (Fig. 5c) and their association with DNA binding protein motifs

265 (Fig. 5c). Notably, the two populations from  $\alpha$ GalCer immunized mice had increased

266 accessibility for cluster 7, with motifs for T-box proteins and to a lesser extent NF $\kappa$ B

267 (RHD motifs) and IRF proteins. There also was decreased accessibility in regions

268 containing motifs associated with the lineage driving transcription factors ROR $\gamma$ t

269 (nuclear receptor motifs) and GATA3 (zinc finger motifs) enriched in clusters 1 and 2.

270 Accessible regions specific to NKT<sub>FH</sub> cells within clusters 8 and 9 were increased for

271 motifs for RHD domain transcription factors, which include NFAT and NF $\kappa$ B, and bZIP

272 motifs, characteristic of Ap-1 family transcription factors, suggesting a more activated

273 state. Clusters 4 and 5 were more accessible in NKT<sub>eff</sub> and also in NKT1 cells from

274 unimmunized mice. These accessible regions were enriched for T-bet, Ets and Runt

275 domain-associated motifs. NKT<sub>eff</sub> cells also had increased accessibility in regions

276 containing more Zinc finger transcription factor and Ets motifs (cluster 6). Although they

277 are reported to be self-reactive, these data suggest that iNKT cells greatly remodel their

278 chromatin landscape following encounter with a potent exogenous glycolipid antigen.

279

280 We also performed RNA-seq on the two populations of iNKT cells from  $\alpha$ GalCer-treated  
281 mice, as well as total splenic iNKT cells from unimmunized mice. Gene expression by  
282  $\text{NKT}_{\text{FH}}$  was greatly different from total splenic iNKT cells (Fig. 5d) or from each of the  
283 iNKT cell subsets from unchallenged mice (Fig. 5e, Supplementary Fig. 4c).  
284 Comparison of differentially expressed genes distinguishing  $\text{CD4}^+$   $\text{T}_{\text{FH}}$  and  $\text{T}_{\text{H1}}$  cells<sup>28</sup>  
285 demonstrated that  $\text{NKT}_{\text{FH}}$  shared a more similar expression profile to  $\text{T}_{\text{FH}}$ , whereas, not  
286 surprisingly,  $\text{NKT1}$  cells were similar to  $\text{T}_{\text{H1}}$  (Supplementary Fig. 4d). Similarities  
287 between  $\text{NKT}_{\text{FH}}$  and  $\text{T}_{\text{FH}}$  also were revealed by GSEA analysis (Fig. 5f, top panel).  
288 GSEA of  $\text{NKT}_{\text{FH}}$  compared to  $\text{NKT}_{\text{eff}}$  revealed an enrichment for  $\text{CD8}^+$  T cell effector-  
289 related genes in  $\text{NKT}_{\text{eff}}$  (Fig. 5f, bottom, left and right panels). Neither antigen-  
290 experienced subset was significantly enriched for memory cell-related signatures.  
291  
292 Because of the great prevalence of  $\text{NKT1}$  cells in the spleens of unimmunized  
293 C57BL/6J mice<sup>6</sup>, it was not feasible to assess directly the separate contributions of the  
294  $\text{NKT1}$ ,  $\text{NKT2}$  and  $\text{NKT17}$  subsets to the antigen-activated iNKT cell populations. To  
295 address their origin, we utilized mice in which T-bet expression could be fate-mapped<sup>29</sup>.  
296 Whereas close to 90% of spleen  $\text{NKT1}$  cells from unimmunized mice expressed the T-  
297 bet fate map marker, only 74% or less of  $\text{NKT}_{\text{FH}}$  did (Fig. 5g). Notably, the T-bet fate  
298 map marker was not expressed in  $\text{NKT2}$  cells. Therefore, some  $\text{NKT}_{\text{FH}}$  may have  
299 originated from the prevalent  $\text{NKT1}$  cell pool, and despite their separation from  $\text{NKT1}$   
300 cells, we found expression of some  $\text{NKT1}$  signature genes by  $\text{NKT}_{\text{FH}}$  (Supplementary  
301 Fig. 4d). However, because prior T-bet expression was selected against in  $\text{NKT}_{\text{FH}}$  cells,  
302 these data suggest that  $\text{NKT2}$  and/or  $\text{NKT17}$  cells also may have contributed.

303 Furthermore, the fate-mapping may underestimate how efficiently NKT2 and/or NKT17  
304 converted to NKT<sub>FH</sub>; T-bet expression could have been induced in some iNKT cells after  
305 antigen activation.

306

### 307 *Enhanced effector function after antigen challenge*

308 As shown in Fig. 5a (right column), iNKT cells from  $\alpha$ GalCer-immunized mice that did  
309 not become NKT<sub>FH</sub> also had a chromatin landscape different from all of the subsets in  
310 unimmunized mice, with the biggest divergence again from NKT17 cells. PCA analysis  
311 of the RNA-seq data showed that the transcriptome of these iNKT cells was highly  
312 different from total iNKT cells from unimmunized mice (Fig. 5d). Previous analyses  
313 have shown that after i.v. exposure to DCs loaded with  $\alpha$ GalCer, a KLRG1<sup>+</sup> population  
314 of iNKT cells develops, especially in the lung, in a process dependent on expression of  
315 the transcription factor Eomes<sup>30, 31</sup>. Cells with this phenotype persisted for weeks and  
316 they exhibited enhanced effector function. Pathway analysis of genes enriched in  
317 NKT<sub>eff</sub> in spleen following  $\alpha$ GalCer alone, using the ConsensusPath Database,  
318 identified NK cell-mediated cytotoxicity as the most enriched pathway (Supplementary  
319 Fig. 4e). This is in line with the gene expression profile in these lymphocytes indicative  
320 of an enhanced effector phenotype found by GSEA (Fig. 5f). Intriguingly, there was  
321 similarity in chromatin accessibility in some key loci between NKT<sub>eff</sub> and splenic NK  
322 cells, with increased ATAC-seq peaks within the loci for genes encoding Granzyme A  
323 and B, KLRG1 and CX3CR1, as well as Spry2, which is also highly expressed by NK  
324 cells (Fig. 6a). There also were some regions of increased chromatin accessibility in

325 genes associated with NK cell function in NKT1 cells, but these regions had higher  
326 signals in NKT<sub>eff</sub> and NK cells.

327

328 To validate the existence of the NKT<sub>eff</sub> population, we assessed the expression of  
329 KLRG1 and CX3CR1, NK cell markers with increased chromatin accessibility in NKT<sub>eff</sub>  
330 (Fig. 6a). We detected increased expression of each of these markers on NKT<sub>eff</sub>  
331 compared to NKT<sub>FH</sub> and iNKT cells from uninjected mice (Fig. 6b). T-bet fate-mapping  
332 analysis revealed that virtually all KLRG1<sup>+</sup> NKT<sub>eff</sub> had expressed T-bet, suggesting  
333 either these cells differentiated from NKT1 cells or acquired expression T-bet when  
334 activated (Fig. 5g). To determine if the phenotypic changes we observed were  
335 maintained, we also analyzed splenic iNKT cell populations at day 30 or later after  
336 antigen exposure. iNKT cells with the NKT<sub>eff</sub> phenotype were still a sizeable fraction of  
337 the iNKT cells (Fig. 6c). Similarly, NKT<sub>FH</sub> cells also persisted in the spleen beyond day  
338 30 (Supplementary Fig. 4f), consistent with a report showing elevation of NKT<sub>FH</sub> 60 days  
339 post-treatment with  $\alpha$ GalCer and ovalbumin-loaded liposomes<sup>32</sup>. These data suggest  
340 that antigen challenge induces dynamic and prolonged changes in the phenotype of  
341 iNKT cells reflecting changes in the transcriptome and chromatin landscape.



342 **Discussion**

343 There are functional subsets of iNKT cells, analogous to CD4 T<sub>H1</sub>, T<sub>H2</sub> and T<sub>H17</sub> cells, as  
344 well as several other lymphocyte populations<sup>7</sup>, and it has been established that the  
345 chromatin landscape and transcriptomes of the thymic iNKT cell subsets are distinct<sup>7, 12</sup>.  
346 Here, we addressed three questions. First, to what extent are the gene programs  
347 driving the thymic iNKT cell subsets present in peripheral iNKT cells? Second,  
348 considering that iNKT cells are mostly non-recirculating lymphocytes<sup>11</sup>, what is the  
349 imprint of localization in different tissues on these gene programs? Third, to what extent  
350 are the iNKT cell gene programs subject to dynamic and long-term changes following  
351 antigenic stimulation, as such changes might be suggestive of trained immunity or an  
352 effector-memory response?

353  
354 Our data indicated that the status of chromatin accessibility and the transcriptome in  
355 any one subset are relatively similar to one another, regardless of location. Although  
356 this suggests that iNKT cells become fully mature and committed to a subset in the  
357 thymus and maintain their status in the periphery, there is evidence based on the  
358 expression of diagnostic surface proteins that iNKT cell recent thymic emigrants are not  
359 fully mature<sup>33, 34, 35</sup>. Perhaps the epigenome of the iNKT cell subsets is set up in the  
360 thymus prior to emigration, but with the mature, subset-specific transcriptome only  
361 initiated after thymus emigration. ATAC-seq analysis of stage 0, stage 1 and mature  
362 NKT1 cells identified regions accessible in mature NKT1 cells were already accessible  
363 in stage 0 cells, providing further evidence to support this hypothesis<sup>36</sup>. Alternatively, it  
364 is possible that the recent thymic emigrants are not fully differentiated but receive

365 tissue-specific cues allowing the cells to mature into an effector subset resembling their  
366 thymic counterparts.

367

368 Although the imprint of tissue localization was comparatively limited, in the lung iNKT  
369 cells exhibited motif enrichment in regions of accessible chromatin for bZIP domain  
370 transcription factors, which can include AP-1 and ATF, and RHD (NF- $\kappa$ B) transcription  
371 factors, regardless of the functional subset. This may be related to an activation  
372 signature, consistent with the increased CTLA-4 expression by lung iNKT cells. These  
373 data are consistent with a recent report describing a similar gene expression signature  
374 in lung MAIT and iNKT cells, although it was also consistent with a tissue-residency  
375 pattern<sup>11</sup>. Regardless, the lung signature was present not only in iNKT cell subsets, but  
376 also in NK cells and  $\gamma\delta$  T cells, and to a lesser extent even in CD4<sup>+</sup> T cells compared to  
377 the corresponding cell type in the spleen. A recent study comparing the epigenome of  
378 alveolar CD8<sup>+</sup> resident memory T cells (Trm) found that Trm cells within the lung  
379 interstitial space were enriched for AP-1, FOS and CREM motifs compared to splenic  
380 Trm<sup>37</sup>. In other studies, this lung signature was not just specific to lymphocytes, with  
381 some similarities to the lung epigenome of alveolar macrophages<sup>38</sup>. Based on these  
382 findings and the present study, the lung microenvironment may dictate epigenetic  
383 remodeling and subsequent transcriptional changes. One potentially important factor is  
384 increased oxygen concentration<sup>39, 40</sup>, and also, the lung may face more environmental  
385 exposure to external substances and microbes<sup>40</sup>. Perhaps immune cells in the lung  
386 need to be poised to rapidly respond to challenges. If this were correct, then we would  
387 predict that iNKT cells in sites such as skin or intestine might also have gene programs

388 distinct from cells in thymus, spleen and liver. Consistent with this hypothesis, we found  
389 increased CTLA-4 expression on iNKT cells from the SI-LPL. Additionally, iNKT cells  
390 from the the draining lymph nodes of the lung and the small intestine, the inguinal lymph  
391 node and mesenteric lymph node, express a large number of lung signature genes  
392 including *Fos*, *Fosb*, and *Nr4a1* compared to the thymus and spleen<sup>35</sup>. A more detailed  
393 exploration of the lung activation signature in iNKT cells and other innate populations  
394 within antigen exposed tissues is needed.

395

396 Six days after antigenic exposure, we detected two different iNKT cell populations, one  
397 is  $\text{NKT}_{\text{FH}}$  that is similar to  $\text{T}_{\text{FH}}$ . Previously,  $\text{NKT}_{\text{FH}}$  were reported, based on expression  
398 of BCL-6, a few key surface proteins, and functional assays for T cell help<sup>26</sup>. Here, we  
399 demonstrated that this  $\text{NKT}_{\text{FH}}$  population has a dramatically different chromatin  
400 landscape and transcriptome that resembles  $\text{T}_{\text{FH}}$ . These cells likely originated in part  
401 from NKT1, the major splenic subset population, but probably also from other activated  
402 subsets considering reduced prior T-bet expression, and they persisted for at least 30  
403 days after antigenic challenge. At later time points,  $\text{NKT}_{\text{FH}}$  maintain the capacity to  
404 produce IL-21, but downregulate BCL-6 expression and increase expression of CD62L  
405 and CCR7, consistent with memory  $\text{T}_{\text{FH}}$ <sup>32</sup>. As detected by immune assays, the half-life  
406 of  $\alpha\text{GalCer}$  complexes with CD1d on the surface of DCs *in vivo* was less than 24h<sup>41, 42</sup>.  
407 Given this half-life, it is unlikely that these cells experience any recent exposure to  
408  $\alpha\text{GalCer}$ . Therefore, chromatin remodeling in iNKT cells after antigen exposure led to  
409 the generation of a persisting population of iNKT cells that is expected to have  
410 enhanced helper function for B cells.

411  
412 The second population called  $\text{NKT}_{\text{eff}}$  more closely resembled NK cells. iNKT cells with  
413 this phenotype also were present for at least 30 days. Previously a similar population  
414 was present in lung after injection of antigen-loaded DCs<sup>31</sup>, but here we show that  
415  $\text{NKT}_{\text{eff}}$  can be generated systemically following the same antigenic challenge that also  
416 induces the  $\text{NKT}_{\text{FH}}$  population. In other experiments, it was reported that iNKT cells  
417 exposed to  $\alpha\text{GalCer}$  were anergic for many weeks<sup>43, 44</sup>. In previous work, we did not  
418 find evidence for anergy in the total iNKT cell population, because at 30 days following  
419  $\alpha\text{GalCer}$ , re-challenged iNKT cells remained cytotoxic, effectively signaled through their  
420 TCR, and had increased proliferation compared to iNKT cells responding to  $\alpha\text{GalCer}$  for  
421 the first time<sup>45</sup>. However, we did find reduced pro-inflammatory cytokine production,  
422 which could reflect the distinct functions of  $\text{NKT}_{\text{FH}}$  cells that were likely generated, and a  
423 minority of the iNKT cells that acquired the ability to produce IL-10<sup>45</sup>. Therefore, it is  
424 likely that iNKT cells from mice injected with antigen that did not become  $\text{NKT}_{\text{FH}}$  are  
425 heterogenous, including not only  $\text{NKT}_{\text{eff}}$  but IL-10 producers and perhaps some anergic  
426 cells. Further, in studies of  $\text{KLRG1}^+$  iNKT cell induction by antigen-loaded DCs, these  
427 cells maintain long-term anti-tumor function<sup>31</sup>. The size of the  $\text{NKT}_{\text{eff}}$  population is  
428 difficult to quantify because  $\text{KLRG1}^+$  cells accounted for only a portion, with other cells  
429 expressing high amounts of CX3CR1 and granzymes (Fig. 6b, d). The contributions of  
430 TCR signal strength, co-stimulation, cytokines and other aspects to the generation of  
431 disparate iNKT cell populations remain to be determined, but apparently pulsing DC  
432 with  $\alpha\text{GalCer}$  is a more effective method for generating  $\text{NKT}_{\text{eff}}$  almost exclusively in the  
433 lung<sup>31</sup>.

434  
435 iNKT cells have been classified as innate-like T lymphocytes that bridge the innate and  
436 adaptive immune systems, sharing components of cells within each major branch of the  
437 immune response<sup>5</sup>. The capacity for innate-like cells to exhibit long-term changes in  
438 their functional programs in response to antigen exposure has been referred to as  
439 trained immunity<sup>46</sup>. Do iNKT cells exhibit an effector memory response or a form of  
440 trained immunity? At steady-state, iNKT cells have some properties of tissue-resident  
441 memory cells. Many of them express molecules characteristic of canonical resident  
442 memory T cells, such as CD103 and CD69, and like effector memory cells, they  
443 produce cytokines in a TCR-dependent or cytokine-dependent manner within a few  
444 hours<sup>9, 11</sup>. In response to  $\alpha$ GalCer, however, dynamic, long-term changes occur in iNKT  
445 cells, generating NKT<sub>FH</sub>, NKT<sub>eff</sub> populations, and likely others, indicating a degree of  
446 plasticity and heterogeneity that allow these cells to adapt to their history of prior  
447 antigenic stimulation and respond in a variety of contexts.

448

## 449 **Materials and Methods**

450

### 451 *Mice*

452 C57BL/6J female mice aged 6-8 weeks old were purchased from Jackson Laboratories  
453 or bred in-house at La Jolla Institute for Immunology. B6;CBA-Tg(Tbx21-cre)1Dlc/J  
454 (Tbet-cre) were purchased from Jackson Laboratories and then bred with  
455 B6.Cg-Gt(ROSA)26Sor<sup>tm14(CAG-tdTomato)Hze/J</sup> (Td-tomato) mice (also obtained from  
456 Jackson Laboratories) to generate the T-bet fate mapping line. All studies were

457 approved by the Institutional Animal Care and Use Committee at the La Jolla Institute  
458 for Immunology.

459

#### 460 *Tissue Preparation*

461 Following euthanasia, thymus tissue and spleens were removed, lungs and livers were  
462 perfused with 3-10 mL of liver perfusion medium (Gibco) until tissues cleared. Livers  
463 were mashed through a 70  $\mu$ M nylon filter (Fisher). Liver lymphocytes were isolated by  
464 centrifugation at 850xg in 37.5% Percoll for 20 minutes. Lungs were placed in  
465 GentleMacs C tubes (Miltenyi Biotec) with 2 mL Spleen Dissociation Medium  
466 (STEMCELL Technologies) and homogenized using the Miltenyi GentleMacs  
467 dissociator. Following homogenization, suspensions were filtered with a 70  $\mu$ M filter  
468 and washed twice with RPMI + 10% FBS. Thymus and spleens were homogenized  
469 through a 70  $\mu$ M nylon filter and washed with RPMI + 10% FBS. For lamina propria  
470 lymphocyte isolation, small intestines were collected from mice and Peyer's patches  
471 removed. The tissue was washed and cut into pieces that were then incubated in 25 ml  
472 of HBSS (5% FBS, 25mM HEPES and 1mM DTT) in a shaker at 225 r.p.m., 37°C, for  
473 20 min. Samples were filtered and the tissue debris was incubated in 20 ml of HBSS  
474 (25mM HEPES and 20mM EDTA) in a shaker at 225 r.p.m., 37°C, 2 times for 15 min to  
475 further remove epithelial cells. Then, tissues were incubated at 37°C for 25 min with  
476 rotation in media containing collagenase type VIII (Sigma). The filtered cell suspension  
477 was re-suspended in 40% Percoll solution and overlaid above 80% Percoll solution. LPL  
478 were collected from the interface.

479

480 *Antigen challenge*

481  $\alpha$ -galactosyl ceramide ( $\alpha$ GalCer or KRN7000) was supplied as a lyophilizate in vehicle  
482 and provided by Kyowa Kirin Pharmaceutical Research. It was resuspended at 200  
483  $\mu$ g/mL in water and then diluted to 10  $\mu$ g/mL in PBS. 0.2 mL of 10  $\mu$ g/mL  $\alpha$ GalCer was  
484 administered via retro-orbital injection, and 6- or  $\geq$ 30-days later mice were euthanized  
485 and organs harvested.

486

487 *Cell Sorting*

488 For RNA-seq and ATAC-seq experiments, unless otherwise noted iNKT cell subsets  
489 were sorted in parallel from tissues pooled from 15-20 female C57BL/6J mice,  
490 approximately 6 weeks of age. Cell suspensions from thymus, spleen and lung were  
491 enriched for iNKT cells by negative selection using biotinylated antibodies against CD8 $\alpha$   
492 (53–6.7, BD Biosciences), CD19 (1D3, Tonbo Biosciences), CD24 (M1/69, BD  
493 Biosciences), CD62L (MEL-14, Invitrogen), CD11b (M1/70, Tonbo Biosciences), CD11c  
494 (N418, Tonbo Biosciences), F4/80 (BM5.1, Tonbo Biosciences), EpCam(G8.8,  
495 BioLegend), and TER-119 (TER-119, Tonbo Biosciences) together with RapiDspheres  
496 (StemCell technologies) and either the Big Easy or Easy eight magnets (StemCell  
497 technologies) using protocols from the manufacturer. The remaining cells were then  
498 suspended at  $10^8$  cells/mL, incubated with 1  $\mu$ g/mL of Streptavidin A (Sigma-Aldrich).  
499 Liver lymphocytes were not enriched for iNKT cells. iNKT cells were stained using a 12-  
500 parameter panel of reagents including tetramers of CD1d loaded with  $\alpha$ GalCer (BV421,  
501 in house preparation), live/dead yellow (ThermoFisher Scientific), anti-TCR $\beta$ -APC-  
502 eF780 (H57-597, ThermoFisher Scientific), anti-CD8 $\alpha$ -PE CF594 (53-6.7, BD

503 Biosciences) and anti-CD19-PE CF594 (1D3, BD Biosciences), anti-CD4-AF700  
504 (GK1.5, BioLegend), anti-IL-17RB-AF488 (FAB10402G, R&D Systems), anti-ICOS-  
505 PerCP Cy5.5 (C398.4A, BioLegend), anti-CD122-BV650 (5H4, BD Biosciences), anti-  
506 CXCR3-APC (CXCR3-173, BioLegend), anti-SDC1-PE (281-2, BioLegend), and anti-  
507 FR4-PE Cy7 (ebio12A5, ThermoFisher Scientific). Cells were sorted using a FACS Aria  
508 III or FACS Aria Fusion (BD Biosciences) for live lymphocytes, singlets, CD8<sup>-</sup>CD19<sup>-</sup>,  
509 Tetramer<sup>+</sup>TCR $\beta$ <sup>+</sup> iNKT cells and separated into NKT1, NKT2, and NKT17 cell subsets  
510 based on the following expression profiles: NKT1: CXCR3<sup>+</sup>ICOS<sup>-</sup>CD122<sup>+</sup>SDC1<sup>-</sup>IL-17RB<sup>-</sup>  
511 ; NKT2: CXCR3<sup>-</sup>ICOS<sup>+</sup>CD122<sup>-</sup>SDC1<sup>-</sup>IL-17RB<sup>+</sup>CD4<sup>+</sup>; NKT17: CXCR3<sup>-</sup>ICOS<sup>+</sup>CD122<sup>-</sup>  
512 SDC1<sup>+</sup>IL-17RB<sup>+</sup>FR4<sup>-</sup>.

513  
514 For NKT<sub>FH</sub> sorts, spleens were harvested 6 days following antigen challenge. Single  
515 cell suspensions were enriched for iNKT cells as described above. iNKT cells were  
516 stained with CD1d tetramers loaded with  $\alpha$ GalCer, live/dead yellow, anti-CD8 $\alpha$ -PE  
517 CF594 and anti-CD19-PE CF594, anti-TCR $\beta$ -APC-eF780. NKT<sub>FH</sub> cells were identified  
518 based on expression of CXCR5 (anti-CXCR5-PE, clone L138D7, BioLegend), and PD-1  
519 (anti-PD-1-APC, clone RMP1-30, BioLegend). CXCR5<sup>-</sup>PD-1<sup>-</sup> iNKT cells from antigen  
520 challenged mice were also sorted for comparison (NKT<sub>eff</sub>).

521  
522 For sorting of  $\gamma\delta$  T cells, CD4<sup>+</sup> T cells, NK cells, and iNKT cells from lung and spleen,  
523 tissues were prepared and enriched as described above. Populations were sorted  
524 based on the following gating strategy: live lymphocytes, singlets, CD8<sup>-</sup>CD19<sup>-</sup>; iNKT  
525 cells, Tetramer<sup>+</sup>TCR $\beta$ <sup>+</sup>;  $\gamma\delta$  T cells, TCR $\beta$ <sup>-</sup>TCR $\gamma\delta$ <sup>+</sup> (anti-TCR $\gamma\delta$ -FITC, clone GL3, BD



526 Biosciences); NK cells, TCR $\beta$ <sup>-</sup>, NK1.1<sup>+</sup> (anti-NK1.1-PE Cy7, clone PK136, BD

527 Biosciences); CD4<sup>+</sup> T cells, TCR $\beta$ <sup>+</sup>CD4<sup>+</sup>.

528

### 529 *Flow Cytometry*

530 Cells isolated from the lung or spleen were stained for iNKT cell subsets, NKT<sub>FH</sub> and

531 NKT<sub>eff</sub>, as described above. In addition to the antibodies and other reagents used

532 for iNKT isolation described above, we also used anti-PLZF-AF647 (clone R17–809),

533 anti-T-bet-AF488 (clone O4–46), anti-ROR $\gamma$ t-PE-CF594 (clone Q31-378), anti-BCL-6-

534 AF488 (clone K112-91), all from BD Biosciences, anti-KLRG1- PE-Cy7 (clone 2F1), and

535 anti-CTLA-4-PE (clone UC10-4B9), all from Thermo-Fisher Scientific, and anti-

536 CX3CR1-BV711 (clone SA011F11, BioLegend). Staining for total CTLA-4 expression

537 was performed according to a using Cytotfix (BD Biosciences) and eBioscience

538 permeabilization buffer (Thermo-Fisher Scientific). Stained samples were analyzed

539 using a Fortessa flow cytometer (BD Biosciences) and FlowJo software (Treestar).

540

### 541 *RNA-seq*

542 Cells representing specific iNKT subsets were sorted by pools of cells ranging between

543 200 to 400 directly into 0.2 ml PCR tubes containing 8  $\mu$ l of low-input lysis buffer (0.2%

544 Triton-X-100 and RNase inhibitor) and stored at -80°C until processed further. For

545 thymic subsets, n = 5 (NKT1), n = 4 (NKT2), n = 6 (NKT17). For peripheral subsets,

546 NKT1: lung n = 5, liver n = 5, spleen n = 7; NKT2: lung n = 6, spleen n = 7; NKT17: lung

547 n = 7, spleen n = 6. For NKT<sub>FH</sub>, n = 6, NKT<sub>eff</sub>, n = 3. For lung cell types, NK: lung n = 3,

548 spleen n = 4;  $\gamma\delta$  T cells: lung n = 3, spleen n = 3; CD4<sup>+</sup> T cells: lung n = 3, spleen n = 5.

549 For bulk library preparation for sequencing we used the Smart-Seq2 protocol<sup>47</sup>, adapted  
550 for samples with small cell numbers. We followed the protocol as described previously<sup>19</sup>,  
551 <sup>47</sup> with following modifications: (i) the pre-amplification PCR cycle was set between 17  
552 to 23 cycles; (ii) to eliminate any traces of primer-dimers, the PCR pre-amplified cDNA  
553 product was purified using 0.8x Ampure-XP beads (Beckman Coulter) before using the  
554 DNA for sequencing library preparation. One ng of pre-amplified cDNA was used to  
555 generate barcoded Illumina sequencing libraries (Nextera XT library preparation kit -  
556 Illumina) in 8  $\mu$ l reaction volume. Samples failing any quality control step (DNA quality  
557 assessed by capillary electrophoresis (Fragment analyzer, Advance analytical) and  
558 quantity (Picogreen quantification assay, Thermofisher) were eliminated from further  
559 downstream steps<sup>19</sup>. Libraries were then pooled at equal molar concentration and  
560 quantified (KAPA SYBR® FAST qPCR Kit - Roche)<sup>19</sup>. Samples from the experiment  
561 comparing splenic NKT<sub>FH</sub> and NKT<sub>eff</sub> cells from  $\alpha$ GalCer-challenged mice with  
562 unchallenged splenic iNKT cells were sequenced via a 100 x 100 bp paired-end read  
563 strategy using the NovaSeq6000 sequencing platform (NovaSeq 6000 S4 P200 kits -  
564 Illumina). Sequencing for all other samples was performed according to a 50 bp single-  
565 end strategy using the HiSeq2500 sequencer (HiSeq SBS Kit v4; Illumina). Post-  
566 sequencing, stringent quality controls were applied and samples that failed quality  
567 control standards were eliminated from further analysis<sup>19</sup>. Samples we sequenced to  
568 obtain at least 8 million uniquely mapped reads.

569  
570 The single-end reads that passed Illumina filters were filtered for reads aligning to tRNA,  
571 rRNA, adapter sequences, and spike-in controls. The reads were then aligned to mm10

572 reference genome using TopHat (v 1.4.1)<sup>48</sup>. DUST scores were calculated with  
573 PRINSEQ Lite (v 0.20.3)<sup>49</sup> and low-complexity reads (DUST > 4) were removed from  
574 the BAM files. The alignment results were parsed via the SAMtools<sup>50</sup> to generate SAM  
575 files. Read counts to each gene were obtained with the htseq-count program (v 0.7.1)<sup>51</sup>  
576 using the “union” option. After removing absent features (zero counts in all samples),  
577 the raw counts were then imported in most cases to the R/Bioconductor package  
578 DESeq2 (v 1.6.3)<sup>52</sup> to identify differentially expressed genes among samples, with P-  
579 values for differential expression calculated using the Wald test for differences between  
580 the base means of two conditions. For the analysis of iNKT samples collected after in  
581 vivo stimulation, the R/Bioconductor package EdgeR was used, and P values were  
582 determined using the quasi-likelihood F test. For determination of signature genes of  
583 specific iNKT subsets, we included genes that exhibited a 2-fold or greater expression  
584 difference with a P value of  $\leq 0.1$  in all pairwise comparisons between the given subset  
585 and the other two subsets in each of the organs from which all three subsets were  
586 collected (thymus, spleen and lung). Similarly, the signature genes of spleen, lung and  
587 thymus were defined as those genes exhibiting a fold change of  $\geq 2$  with a P value of  
588  $\leq 0.1$  in all possible comparisons between the same iNKT subset from different organs.  
589 Signature genes of splenic iNKT populations that either expressed or lacked the FH  
590 markers PD-1 and CXCR5 after  $\alpha$ GalCer stimulation were determined in a similar  
591 fashion, except that P-values were adjusted for multiple test correction using Benjamini  
592 Hochberg algorithm<sup>50</sup>, and both stimulated populations were also compared to  
593 unchallenged total splenic iNKT. Principal Component Analysis (PCA) was performed  
594 using the ‘prcomp’ function in R. The sequences used in this article will be submitted to

595 the Gene Expression Omnibus and the accession number will be reported prior to  
596 publication (<http://www.ncbi.nlm.nih.gov/geo/>). Data were also analyzed using the Pre-  
597 ranked Gene Set Enrichment Analysis algorithm (Broad Institute and University of  
598 California), as well as the Consensus Path Database platform (Max Planck Institute).

599

#### 600 *ATAC-seq*

601 ATAC-seq was performed as previously described with some modifications<sup>13</sup>. For  
602 thymic subsets, n = 4 (NKT1), n = 4 (NKT2), n = 3 (NKT17). For peripheral subsets,  
603 NKT1: lung n = 3, liver n = 2, spleen n = 2; NKT2: lung n = 1, spleen n = 2; NKT17: lung  
604 n = 2, spleen n = 2. For NKT<sub>FH</sub>, n = 6, NKT<sub>eff</sub>, n = 3. For lung cell types, NK: lung n = 1,  
605 spleen n = 2;  $\gamma\delta$  T cells: lung n = 2, spleen n = 3; CD4<sup>+</sup> T cells: lung n = 2, spleen n = 3.  
606 iNKT cells or lung lymphocytes (10,000) were sorted into 1.5 mL Eppendorf tubes  
607 containing PBS with 5% FCS. Cells were centrifuged at 600g for 10 minutes at 4°C,  
608 washed with 50  $\mu$ L PBS, then resuspended in 50  $\mu$ L ATAC lysis buffer (10 mM Tris pH  
609 7.5, 10 mM NaCl, 3 mM MgCl<sub>2</sub>, 0.1% NP-40). Cells were centrifuged in lysis buffer for  
610 10 minutes at 600g, 4°C. Following lysis, the pellet was resuspended in 50  $\mu$ L ATAC  
611 reaction mix (25 $\mu$ L 2X TD buffer, 2.5  $\mu$ L Nextera Enzyme, 22.5  $\mu$ L water, Illumina). The  
612 transposase reaction was carried out at 37°C for 30 minutes. Libraries were amplified  
613 using a KAPA HiFi real-time library amplification kit with barcoded primers for 11-12  
614 cycles followed by 2x50 cycle paired-end sequencing. Reads were mapped to mouse  
615 genome (mm9) using bowtie. Unmapped reads were processed with trim galore, re-  
616 mapped with bowtie and merged with previous mapping output. Duplicate reads  
617 identified by picard MarkDuplicates and reads mapping to chrM were excluded. Wiggle

618 files of coverage for individual replicates were computed with MEDIPS<sup>51</sup> using full  
619 fragments captured by ATAC-seq on 10 bp windows and used to generate average  
620 coverage with the Java Genomics Toolkit (available  
621 at: <https://github.com/timpalpant/java-genomics-toolkit>) for each group. Accessible  
622 regions were identified using MACS2<sup>52</sup> from individual replicate bam files downsampled  
623 to a maximum of 5 million reads and limited to a q value of less than 0.001. Peaks that  
624 intersected ENCODE blacklisted regions and those on chromosome Y were excluded.  
625 We refined the groups of accessible regions to non-overlapping peaks with a uniform  
626 width of 500 nucleotides with the readNarrowpeaks function from chromVAR<sup>53</sup>. The  
627 number of reads within each region was computed using all reads from each replicate  
628 with the getCounts function from chromVAR. Differentially accessible regions were  
629 identified with limma/voom, using quantile normalized counts, and selected based on an  
630 fdr adjusted p value of less than 0.1 and an estimated fold change of at least 4. We  
631 associated transcription factors binding motifs from the HOMER database by  
632 determining the enrichment of motifs in groups of peaks with HOMER and comparing  
633 the variability in ATAC-seq signal with chromVAR.

634

## 635 **Acknowledgements**

636 We thank Shu Liang, Alice Wang, Monalisa Mondal and Jeremy Day for assistance with  
637 next generation sequencing and the Flow Cytometry Core Facility at the La Jolla  
638 Institute for Immunology for assistance with cell sorting. We thank Archana Khurana for  
639 generating CD1d- $\alpha$ GalCer tetramers. We thank Anjana Rao for critical feedback on the  
640 manuscript. Supported by the US National Institutes of Health R01 AI71922, AI105215,

641 AI137230 to M.K.; R01 AI040127 and AI109842 to Anjana Rao and Patrick Hogan; T32  
642 AI125179 to M.P.M.; Shared Instrumentation Grant (SIG) Program S10 OD018499 to  
643 the Flow Cytometry Core Facility at the La Jolla Institute for Immunology; S10  
644 RR027366 for a FACS Aria II cell sorter to Dr. Michael Croft; S10 OD016262 for an  
645 Illumina HiSeq 2500 sequencing system to Dr. Anjana Rao; S10 OD025052 for a  
646 NovaSeq 6000 sequencer to Dr. Gregory Seumoiois.

647

### 648 **Author Contributions**

649 M.P.M., I.E. and G.S. designed and performed experiments and analyzed data. S.H.M.,  
650 S.L.R. and G-Y.S. performed experiments. A.S., A.L.R.P. and J.G. analyzed the RNA-  
651 seq data. P.V. designed the study. J.S.B. analyzed the ATAC-seq data. M.P.M and  
652 M.K. wrote the manuscript. J.S.B and M.K. supervised the project, designed the study,  
653 and analyzed data.

654

### 655 **Competing interests**

656 The authors declare no competing interests.

657

### 658 **References**

- 659 1. Mori, L., Lepore, M. & De Libero, G. The Immunology of CD1- and MR1-Restricted T  
660 Cells. *Annu Rev Immunol* **34**, 479-510 (2016).  
661  
662 2. Godfrey, D.I. & Kronenberg, M. Going both ways: Immune regulation via CD1d-  
663 dependent NKT cells. *Journal of Clinical Investigation* **114**, 1379-1388 (2004).  
664  
665 3. Verykokakis, M., Zook, E.C. & Kee, B.L. ID'ing innate and innate-like lymphoid cells.  
666 *Immunol Rev* **261**, 177-197 (2014).  
667

- 668 4. Godfrey, D.I., Koay, H.F., McCluskey, J. & Gherardin, N.A. The biology and functional  
669 importance of MAIT cells. *Nat Immunol* **20**, 1110-1128 (2019).  
670
- 671 5. Godfrey, D.I., Uldrich, A.P., McCluskey, J., Rossjohn, J. & Moody, D.B. The burgeoning  
672 family of unconventional T cells. *Nat Immunol* **16**, 1114-1123 (2015).  
673
- 674 6. Lee, Y. *et al.* Tissue-Specific Distribution of iNKT Cells Impacts Their Cytokine  
675 Response. *Immunity* **43**, 566-578 (2015).  
676
- 677 7. Lee, Y. *et al.* Lineage-Specific Effector Signatures of Invariant NKT Cells Are Shared  
678 amongst  $\gamma\delta$  T, Innate Lymphoid, and Th Cells. *The Journal of Immunology* **197**, 1460-  
679 1470 (2016).  
680
- 681 8. Engel, I. *et al.* Innate-like functions of natural killer T cell subsets result from highly  
682 divergent gene programs. *Nature Immunology* **17**, 728-739 (2016).  
683
- 684 9. Crosby, C.M. & Kronenberg, M. Tissue-specific functions of invariant natural killer T  
685 cells. *Nat Rev Immunol* **18**, 559-574 (2018).  
686
- 687 10. Lynch, L. *et al.* Regulatory iNKT cells lack expression of the transcription factor PLZF  
688 and control the homeostasis of Treg cells and macrophages in adipose tissue. *Nature*  
689 *Immunology* **16**, 85-95 (2015).  
690
- 691 11. Salou, M. *et al.* A common transcriptomic program acquired in the thymus defines tissue  
692 residency of MAIT and NKT subsets. *J Exp Med* **216**, 133-151 (2019).  
693
- 694 12. Georgiev, H., Ravens, I., Benarafa, C., Forster, R. & Bernhardt, G. Distinct gene  
695 expression patterns correlate with developmental and functional traits of iNKT subsets.  
696 *Nat Commun* **7**, 13116 (2016).  
697
- 698 13. Buenrostro, J.D., Giresi, P.G., Zaba, L.C., Chang, H.Y. & Greenleaf, W.J. Transposition  
699 of native chromatin for fast and sensitive epigenomic profiling of open chromatin, DNA-  
700 binding proteins and nucleosome position. *Nature Methods* **10**, 1213-1218 (2013).  
701
- 702 14. Scott-Browne, J.P. *et al.* Dynamic Changes in Chromatin Accessibility Occur in CD8+ T  
703 Cells Responding to Viral Infection. *Immunity* **45**, 1327-1340 (2016).  
704
- 705 15. Scharer, C.D., Bally, A.P., Gandham, B. & Boss, J.M. Cutting Edge: Chromatin  
706 Accessibility Programs CD8 T Cell Memory. *J Immunol* **198**, 2238-2243 (2017).  
707
- 708 16. Lee, D.U., Avni, O., Chen, L. & Rao, A. A Distal Enhancer in the Interferon- $\gamma$  (IFN- $\gamma$ )  
709 Locus Revealed by Genome Sequence Comparison. *Journal of Biological Chemistry* **279**,  
710 4802-4810 (2004).  
711

- 712 17. Berga-Bolanos, R., Zhu, W.S., Steinke, F.C., Xue, H.H. & Sen, J.M. Cell-autonomous  
713 requirement for TCF1 and LEF1 in the development of Natural Killer T cells. *Mol*  
714 *Immunol* **68**, 484-489 (2015).  
715
- 716 18. Carr, T. *et al.* The transcription factor lymphoid enhancer factor 1 controls invariant  
717 natural killer T cell expansion and Th2-type effector differentiation. *J Exp Med* **212**, 793-  
718 807 (2015).  
719
- 720 19. Rosales, S.L. *et al.* A Sensitive and Integrated Approach to Profile Messenger RNA from  
721 Samples with Low Cell Numbers. *Methods Mol Biol* **1799**, 275-302 (2018).  
722
- 723 20. Lazarevic, V. *et al.* The gene encoding early growth response 2, a target of the  
724 transcription factor NFAT, is required for the development and maturation of natural  
725 killer T cells. *Nat Immunol* **10**, 306-313 (2009).  
726
- 727 21. Aliahmad, P. & Kaye, J. Development of all CD4 T lineages requires nuclear factor  
728 TOX. *J Exp Med* **205**, 245-256 (2008).  
729
- 730 22. Chen, Y.G. *et al.* CD38 is required for the peripheral survival of immunotolerogenic  
731 CD4+ invariant NK T cells in nonobese diabetic mice. *J Immunol* **177**, 2939-2947  
732 (2006).  
733
- 734 23. Huynh, H., Ng, C.Y., Ong, C.K., Lim, K.B. & Chan, T.W. Cloning and characterization  
735 of a novel pregnancy-induced growth inhibitor in mammary gland. *Endocrinology* **142**,  
736 3607-3615 (2001).  
737
- 738 24. Tsagaratou, A. *et al.* TET proteins regulate the lineage specification and TCR-mediated  
739 expansion of iNKT cells. *Nat Immunol* **18**, 45-53 (2017).  
740
- 741 25. Best, J.A. *et al.* Transcriptional insights into the CD8(+) T cell response to infection and  
742 memory T cell formation. *Nat Immunol* **14**, 404-412 (2013).  
743
- 744 26. Chang, P.-P. *et al.* Identification of Bcl-6-dependent follicular helper NKT cells that  
745 provide cognate help for B cell responses. *Nature Immunology* **13**, 35-43 (2011).  
746
- 747 27. Gaya, M. *et al.* Initiation of Antiviral B Cell Immunity Relies on Innate Signals from  
748 Spatially Positioned NKT Cells. *Cell* **172**, 517-1082130432 (2018).  
749
- 750 28. Choi, Y.S. *et al.* LEF-1 and TCF-1 orchestrate T(FH) differentiation by regulating  
751 differentiation circuits upstream of the transcriptional repressor Bcl6. *Nat Immunol* **16**,  
752 980-990 (2015).  
753
- 754 29. Yu, F., Sharma, S., Edwards, J., Feigenbaum, L. & Zhu, J. Dynamic expression of  
755 transcription factors T-bet and GATA-3 by regulatory T cells maintains  
756 immunotolerance. *Nat Immunol* **16**, 197-206 (2015).  
757



- 758 30. Shimizu, K. *et al.* Eomes transcription factor is required for the development and  
759 differentiation of invariant NKT cells. *Commun Biol* **2**, 150 (2019).  
760
- 761 31. Shimizu, K. *et al.* KLRG+ invariant natural killer T cells are long-lived effectors. *Proc*  
762 *Natl Acad Sci U S A* **111**, 12474-12479 (2014).  
763
- 764 32. Chen, Z. *et al.* Memory Follicular Helper Invariant NKT Cells Recognize Lipid Antigens  
765 on Memory B Cells and Elicit Antibody Recall Responses. *J Immunol* **200**, 3117-3127  
766 (2018).  
767
- 768 33. Wang, H. & Hogquist, K.A. CCR7 defines a precursor for murine iNKT cells in thymus  
769 and periphery. *Elife* **7** (2018).  
770
- 771 34. Pellicci, D.G. *et al.* A Natural Killer T (NKT) Cell Developmental Pathway Involving a  
772 Thymus-dependent NK1.1-CD4+ CD1d-dependent Precursor Stage. *The Journal of*  
773 *Experimental Medicine* **195**, 835-844 (2002).  
774
- 775 35. Jimeno, R. *et al.* Tissue-specific shaping of the TCR repertoire and antigen specificity of  
776 iNKT cells. *Elife* **8** (2019).  
777
- 778 36. Gioulbasani, M. *et al.* The transcription factor BCL-6 controls early development of  
779 innate-like T cells. *Nat Immunol* **21**, 1058-1069 (2020).  
780
- 781 37. Hayward, S.L. *et al.* Environmental cues regulate epigenetic reprogramming of airway-  
782 resident memory CD8(+) T cells. *Nat Immunol* **21**, 309-320 (2020).  
783
- 784 38. Lavin, Y. *et al.* Tissue-resident macrophage enhancer landscapes are shaped by the local  
785 microenvironment. *Cell* **159**, 1312-1326 (2014).  
786
- 787 39. Carreau, A., El Hafny-Rahbi, B., Matejuk, A., Grillon, C. & Kieda, C. Why is the partial  
788 oxygen pressure of human tissues a crucial parameter? Small molecules and hypoxia. *J*  
789 *Cell Mol Med* **15**, 1239-1253 (2011).  
790
- 791 40. O'Dwyer, D.N., Dickson, R.P. & Moore, B.B. The Lung Microbiome, Immunity, and the  
792 Pathogenesis of Chronic Lung Disease. *J Immunol* **196**, 4839-4847 (2016).  
793
- 794 41. Halder, R.C. *et al.* Self-glycerophospholipids activate murine phospholipid-reactive T  
795 cells and inhibit iNKT cell activation by competing with ligands for CD1d loading. *Eur J*  
796 *Immunol* **49**, 242-254 (2019).  
797
- 798 42. Sullivan, B.A. *et al.* Mechanisms for glycolipid antigen-driven cytokine polarization by  
799 Valpha14i NKT cells. *J Immunol* **184**, 141-153 (2010).  
800
- 801 43. Parekh, V.V. *et al.* Glycolipid antigen induces long-term natural killer T cell anergy in  
802 mice. *J Clin Invest* **115**, 2572-2583 (2005).  
803

- 804 44. Fujii, S., Shimizu, K., Kronenberg, M. & Steinman, R.M. Prolonged IFN-gamma-  
805 producing NKT response induced with alpha-galactosylceramide-loaded DCs. *Nat*  
806 *Immunol* **3**, 867-874 (2002).  
807
- 808 45. Sag, D., Krause, P., Hedrick, C.C., Kronenberg, M. & Wingender, G. IL-10-producing  
809 NKT10 cells are a distinct regulatory invariant NKT cell subset. *Journal of Clinical*  
810 *Investigation* **124**, 3725-3740 (2014).  
811
- 812 46. Netea, M.G. *et al.* Trained immunity: A program of innate immune memory in health and  
813 disease. *Science* **352**, aaf1098 (2016).  
814
- 815 47. Picelli, S. *et al.* Smart-seq2 for sensitive full-length transcriptome profiling in single  
816 cells. *Nat Methods* **10**, 1096-1098 (2013).  
817
- 818 48. Trapnell, C., Pachter, L. & Salzberg, S.L. TopHat: discovering splice junctions with  
819 RNA-Seq. *Bioinformatics* **25**, 1105-1111 (2009).  
820
- 821 49. Schmieder, R. & Edwards, R. Quality control and preprocessing of metagenomic  
822 datasets. *Bioinformatics* **27**, 863-864 (2011).  
823
- 824 50. Li, H. *et al.* The Sequence Alignment/Map format and SAMtools. *Bioinformatics* **25**,  
825 2078-2079 (2009).  
826
- 827 51. Anders, S., Pyl, P.T. & Huber, W. HTSeq--a Python framework to work with high-  
828 throughput sequencing data. *Bioinformatics* **31**, 166-169 (2015).  
829
- 830 52. Love, M.I., Huber, W. & Anders, S. Moderated estimation of fold change and dispersion  
831 for RNA-seq data with DESeq2. *Genome Biol* **15**, 550 (2014).  
832  
833

834

835

## 836 **Data Availability Statement**

837 Sequence data that support the findings of this study will be deposited in the Gene  
838 Expression Omnibus and the accession codes will be provided prior to publication.

839

840 ATAC-seq sequence data associated figures: Figure 1; Figure 2a, b, c; Figure 3 a, c;

841 Figure 4a; Figure 5 a, b, c; Figure 6b.

842 RNA-seq sequence data associated figures: Figure 2d; Figure 3b; Figure 4 b, c, d, e;  
843 Figure 5 d, e, f; Figure 6a; Supplementary Figure 2; Supplementary Figure 3;  
844 Supplementary Figure 4 c, d.

845

846 There are no restrictions on data availability. Additional information and materials will  
847 be made available upon request.

848

849

850

851

852

853

854

855

856

857

858

859 **Figures**

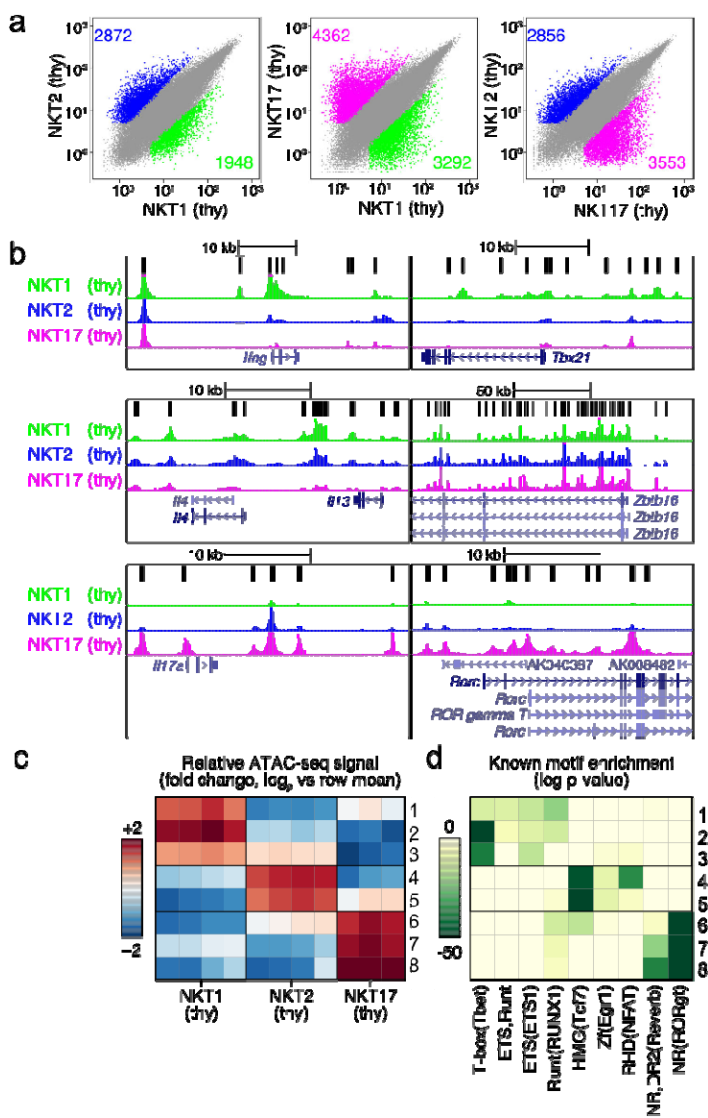

860

861 **Fig. 1. Subsets of thymic iNKT cells have differences in chromatin accessibility.**  
 862 Scatterplot of mean ATAC-seq counts per peak comparing differentially accessible  
 863 regions of chromatin for pairs of thymic iNKT cell subsets. Colors indicate differentially  
 864 accessible regions defined by limma/voom (details in Methods). The numbers of  
 865 differentially expressed genes are indicated. b. ATAC-seq coverage at the indicated  
 866 gene loci with a range of 0-600 for all samples. Grey bar in the upper left panel (*Ifng*)  
 867 locus indicates enhancer region. c. Left, *k*-means clustering of relative ATAC-seq  
 868 density (counts per million mapped reads/kb, log<sub>2</sub> fold change from the mean) identifies  
 869 eight groups of accessible regions that varied similarly (rows), 3 sets for NKT1, 2 for  
 870 NKT2 and 3 for NKT17. Columns indicate number of replicates, 3 or 4. d. Motifs  
 871 enriched in enriched in clusters of accessible regions. All motifs with a HOMER log p-  
 872 value less than -15 and found in 10% or more regions in at least one cluster are shown.

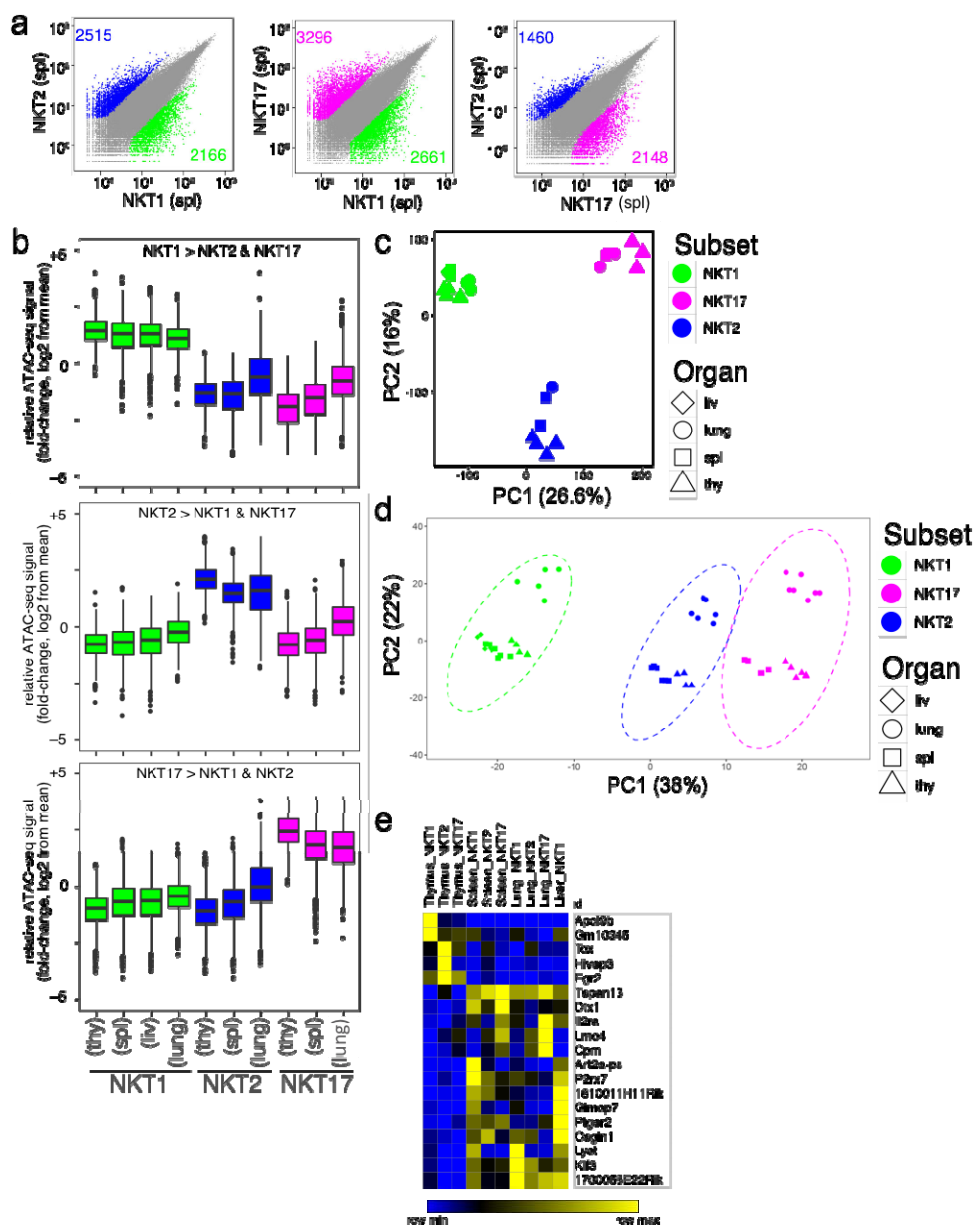

873

874 **Fig. 2. Imprint of tissue location is minor compared to subset.** a. Scatterplot of  
 875 mean ATAC-seq counts per peak comparing differentially accessible regions of  
 876 chromatin for pairs of iNKT cell subsets in spleen. Colors indicate differentially  
 877 accessible regions defined by limma/voom (details in Methods). b. Boxplot of  
 878 normalized average ATAC-seq counts per peak from the indicated samples (labeled at  
 879 bottom) at differentially-accessible regions that distinguish thymic iNKT cell subsets.  
 880 Box indicates interquartile range with whiskers  $\pm 1.5$  times this range and outlier points  
 881 indicated. c, d. PCA display of ATACseq (c) and RNA-seq (d) data from the indicated  
 882 iNKT cell subsets from the different tissues. e. Heat map of normalized reads from  
 883 RNA-seq for genes (19) differentially regulated in thymus versus peripheral iNKT cell  
 884 subsets, within all subsets,  $n > 2$ -fold difference,  $p = 0.1$ .

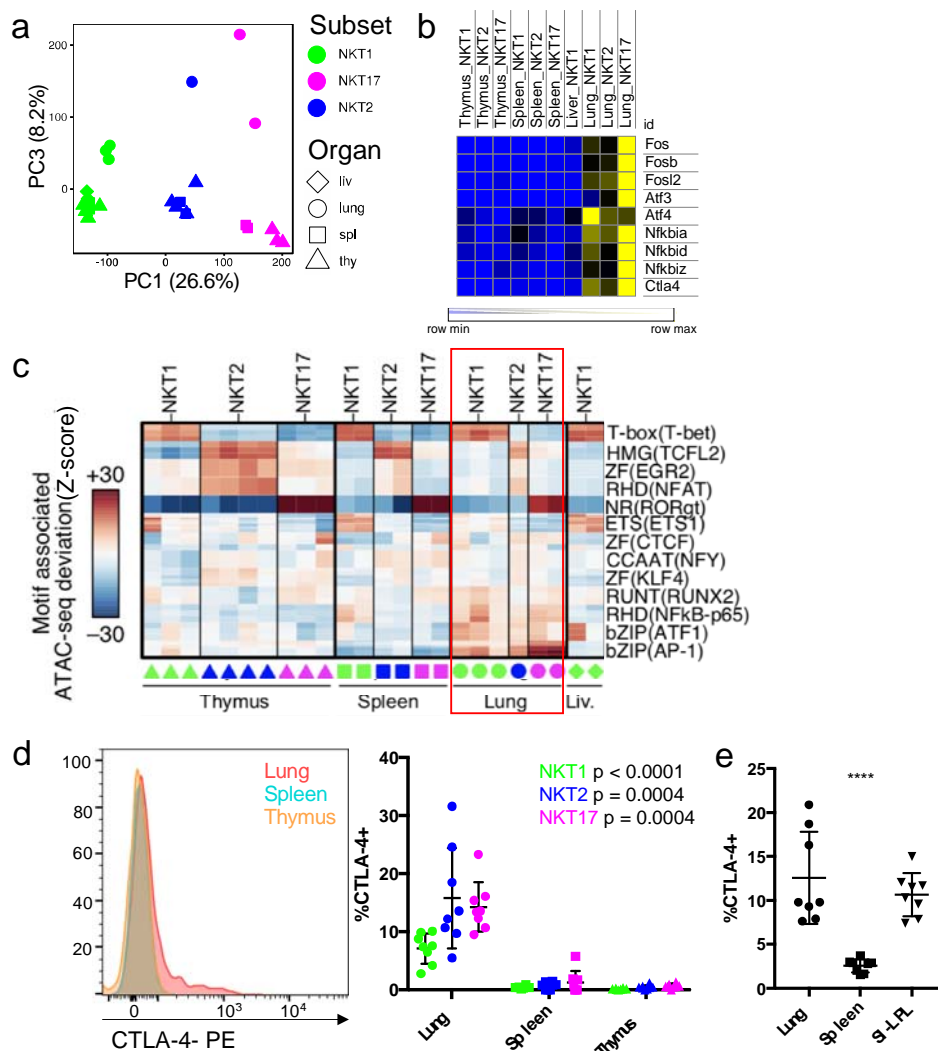

885

886 **Fig. 3. Lung-specific transcriptome and epigenome.** a. PC1 by PC3 display of  
 887 ATAC-seq data showing distribution of iNKT cell subsets from different tissues. b. Heat  
 888 map of relative RNA expression of selected AP-1 and ATF family genes in iNKT subsets  
 889 from the indicated sites. c. chromVAR computed deviation in ATAC-seq signal (Z-score)  
 890 at regions containing indicated transcription factor motifs. Motifs with a p-value less than  
 891  $1e-25$  are shown and families and representative members are labeled. Samples are  
 892 indicated at the bottom, iNKT cell subsets from the lung are boxed to highlight lung-  
 893 enriched motifs. d. Total CTLA-4 expression in permeabilized iNKT cells from the  
 894 indicated tissues. Representative cytogram of total iNKT cells (left) and percent CTLA-  
 895  $4^+$  cells within each subset from the different organs (right). Symbols depict individual  
 896 mice, error bars depict SD. Data are combined from five experiments,  $n = 8$  mice,  
 897 statistical significance assessed via Kruskal-Wallis test. e. Total CTLA-4 expression in  
 898 permeabilized total iNKT cells from indicated tissues. Symbols depict individual mice,  
 899 error bars depict SD,  $n = 8$  mice from two independent experiments. Statistical  
 900 significance assessed via one-way ANOVA.

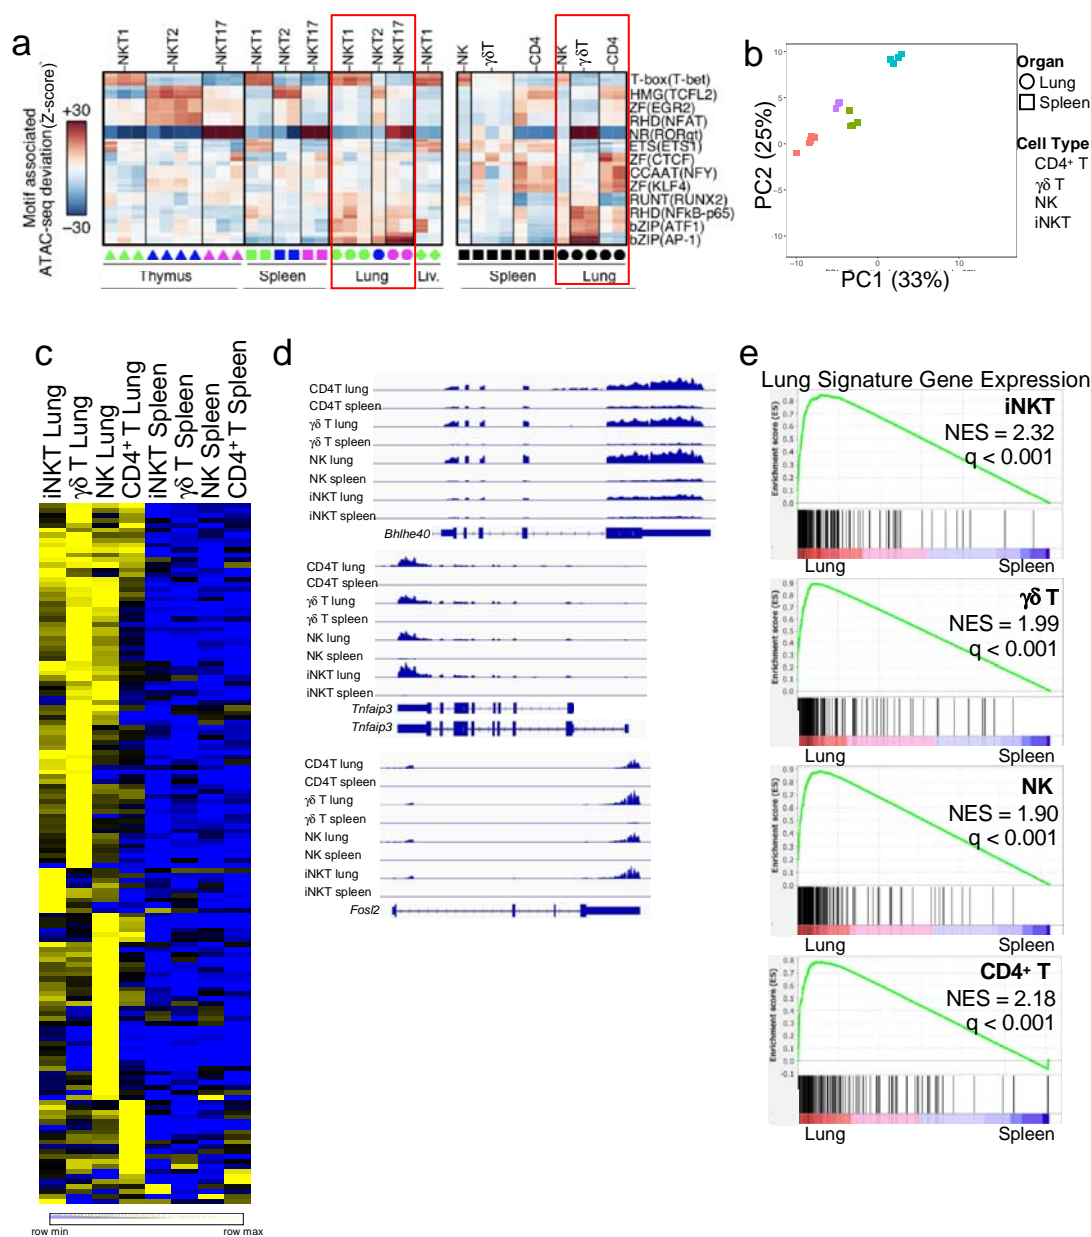

901

902 **Fig. 4. Lung signature extends to other lung populations.** a. chromVAR computed  
 903 deviation in ATAC-seq signal (Z-score) at regions containing indicated transcription  
 904 factor motifs between the indicated cell populations from spleen and lung. Motifs with a  
 905 p-value less than  $1e-25$  are shown and families and representative members are  
 906 labeled. Tissue source of the samples indicated at the bottom of the diagram; columns  
 907 indicate number of replicates. b. PCA of RNA-seq data comparing lymphoid cell types  
 908 isolated from lung and spleen. c. Heat map depicting the lung gene signature from  
 909 Supplementary Fig. 3 with normalized transcript levels from RNA-seq data from the  
 910 indicated cell types from lung and spleen. d. RNAseq read tracks in the *Bhlhe40*,  
 911 *Tnfrsf3* and *Fosl2* loci in samples from lung and spleen from indicated cell types. e.  
 912 GSEA of pre-ranked comparisons of genes differentially expressed in lung iNKT cell  
 913 subsets comparing each cell type within the lung to its counterpart in the spleen.

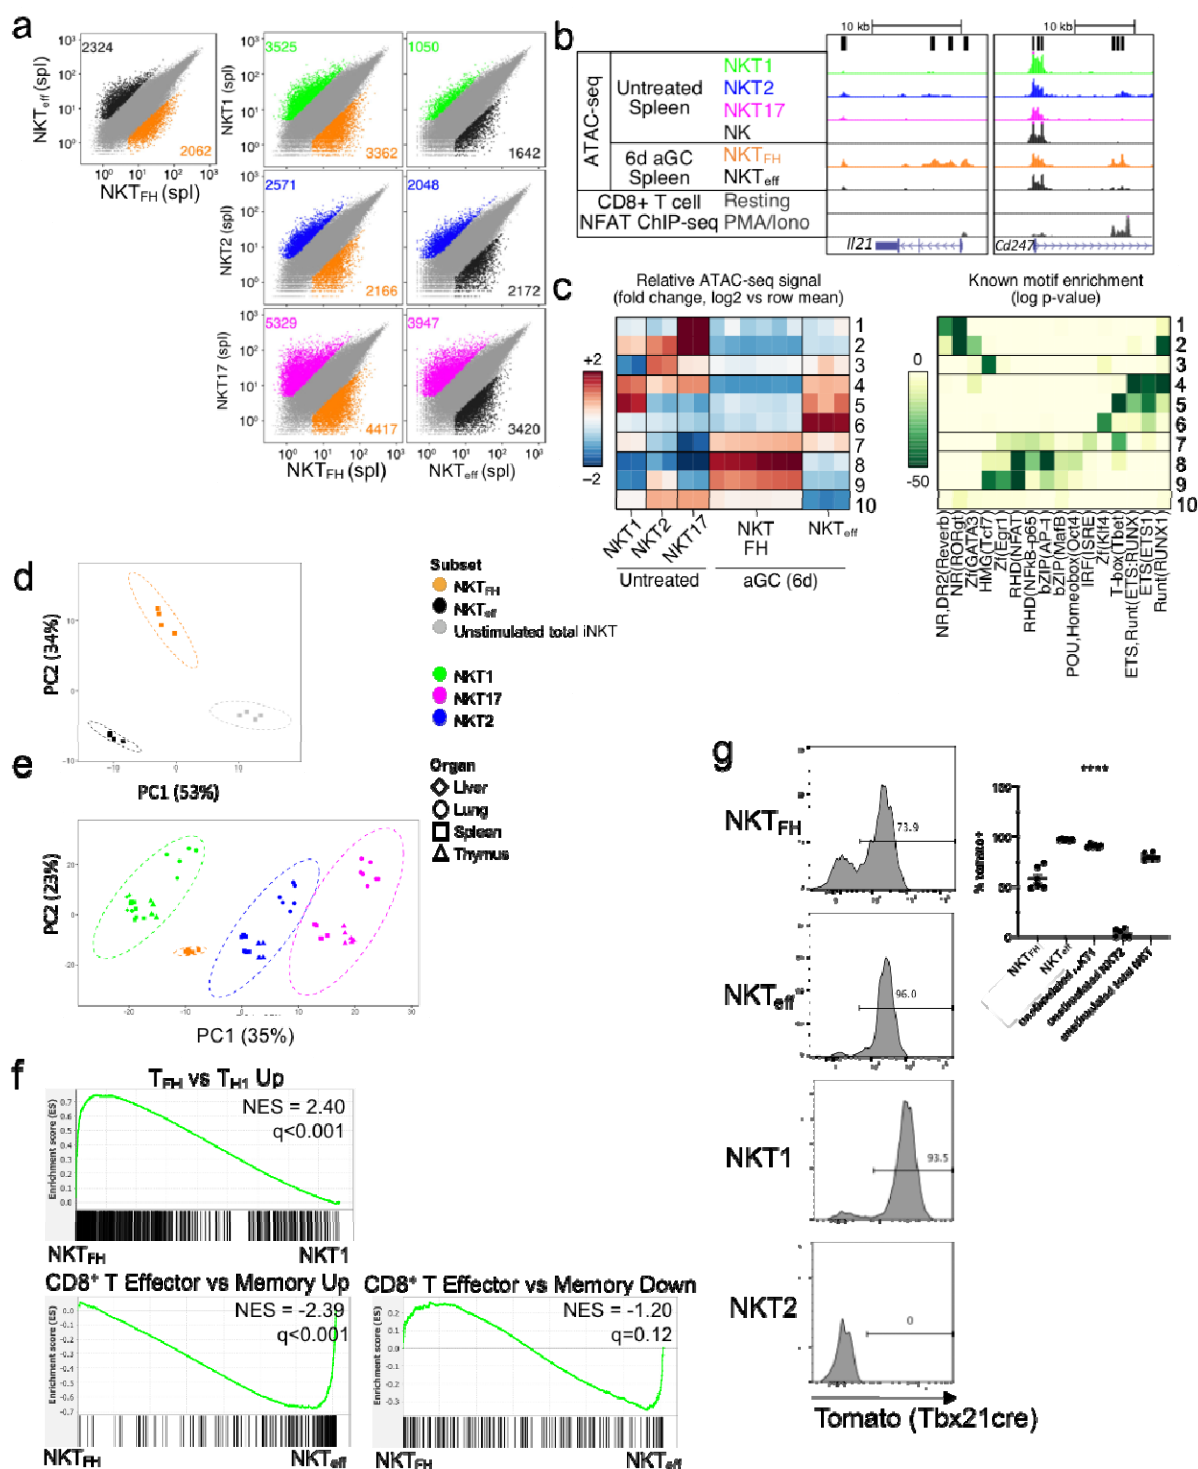

914

915 **Fig. 5. Antigenic experience shapes the transcriptome and chromatin landscape**  
 916 **of iNKT cells.** iNKT cells from  $\alpha$ GalCer-injected mice either selected for PD-1 and  
 917 CXCR5 expression (NKT<sub>FH</sub>) and or negative for both markers (NKT<sub>eff</sub>) were sorted from  
 918 the spleen of mice 6 days after injection (i.v.) with  $\alpha$ GalCer. a. Scatterplots of mean  
 919 ATAC-seq counts per peak comparing antigen experienced NKT<sub>FH</sub> and NKT<sub>eff</sub> (top left)



920 or pairwise comparisons of differentially accessible regions of chromatin for each of the  
921 sorted populations from antigen exposed mice compared to the corresponding subsets  
922 from unimmunized mice. Data from unimmunized mice are the same as depicted in Fig.  
923 2. Colors indicate differentially accessible regions defined by limma/voom (details in  
924 Methods). b. ATAC-seq coverage (range of 0-600 for all samples) comparing the *Ii21*  
925 and *Cd247* loci from unimmunized splenic iNKT cell subsets, splenic NK cells, and  
926 NKT<sub>FH</sub> and NKT<sub>eff</sub> from  $\alpha$ GalCer-treated mice. NFAT ChIP-seq analysis of CD8<sup>+</sup> splenic  
927 T cells with and without PMA/ionomycin stimulation included for comparison<sup>54</sup>. c. Left, *k*-  
928 means clustering of relative ATAC-seq density (counts per million mapped reads/kb,  
929 log<sub>2</sub> fold change from the mean) identifies ten groups of accessible regions that vary  
930 similarly (rows), 2 sets for splenic NKT1, 2 for splenic NKT2, 2 for splenic NKT17, 6 for  
931 NKT<sub>FH</sub> and 3 for NKT<sub>eff</sub>. Columns indicate number of replicates. Right, motifs enriched  
932 in clusters of accessible regions. All motifs with a HOMER log p-value less than -15 and  
933 found in 10% or more regions in at least one cluster are shown. d. PCA analysis of  
934 RNA-seq data comparing NKT<sub>FH</sub> to NKT<sub>eff</sub> from  $\alpha$ GalCer-immunized mice as well as to  
935 total iNKT cells from unimmunized mice. e. PCA analyses of RNA-seq data comparing  
936 splenic NKT1, NKT2 or NKT17 samples to spleen NKT<sub>FH</sub> cells. f. Top: Plot of the  
937 distribution of genes upregulated in mainstream GC T<sub>FH</sub> vs T<sub>H1</sub> in a list of genes ranked  
938 by relative expression (directional p value) in NKT<sub>FH</sub> vs splenic NKT1 cells using GSEA.  
939 Bottom (left and right): Plots of genes differentially regulated between CD8<sup>+</sup> effector vs  
940 memory against a directional p-ranked file comparing  $\alpha$ GalCer-stimulated NKT<sub>FH</sub> vs  
941 NKT<sub>eff</sub>. Normalized Enrichment Scores (NES) and q values were determined by the  
942 pre-ranked GSEA algorithm. g. Expression of reporter in T-bet fate-mapping mice by  
943 NKT<sub>FH</sub> and NKT<sub>eff</sub> cells 6 days-post antigen exposure, and NKT1 and NKT2 cells and  
944 total iNKT cells from unstimulated mice; n = 6 mice per group, error bars depict SEM.  
945 Quantification on right, statistical significance assessed via Kruskal-Wallis test.

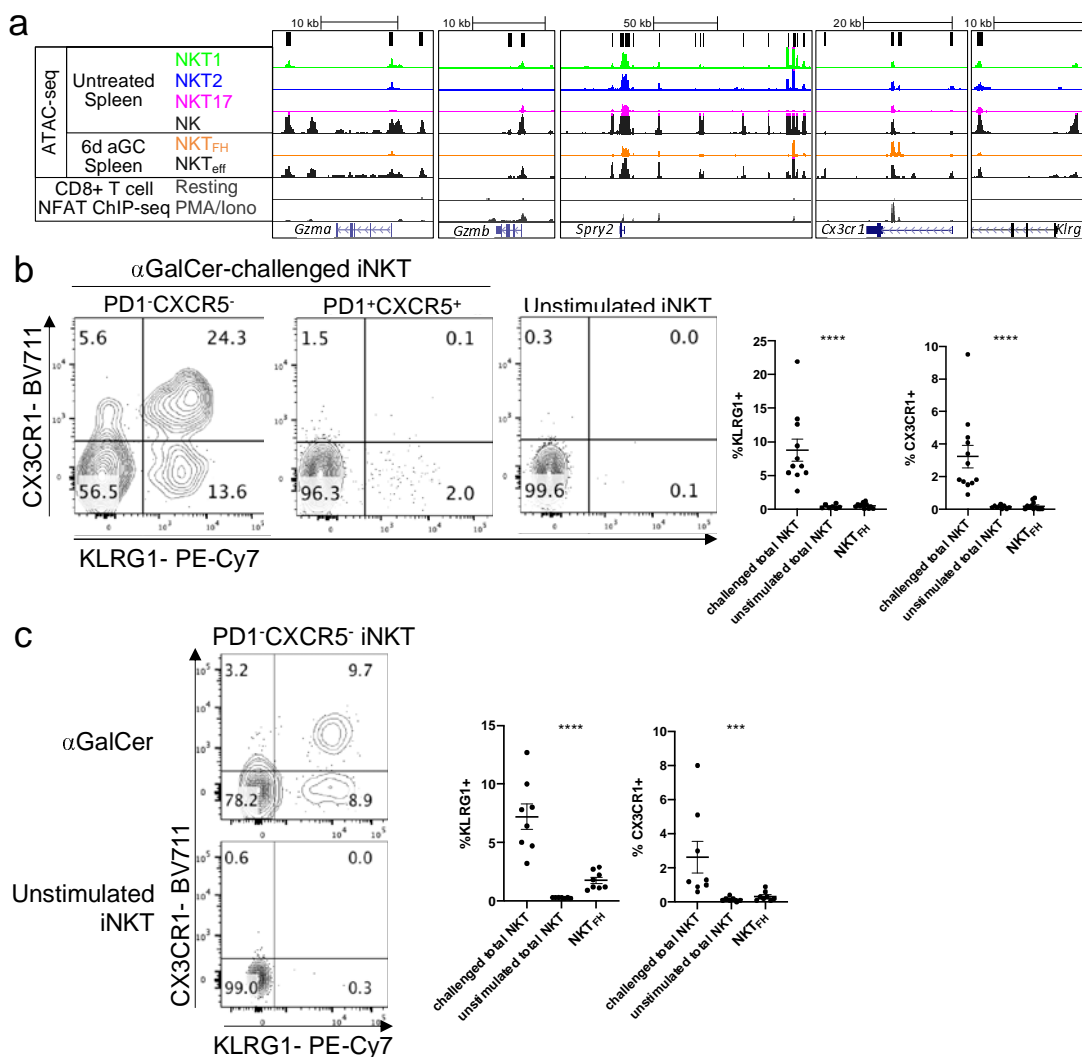

946

947 **Fig. 6. Enhanced effector or NK cell signature in antigen-exposed iNKT cells. a.**  
 948 ATAC-seq coverage (with a range of 0-600 for all samples) at the *Gzma*, *Gzmb* and  
 949 *Spry2* loci comparing untreated splenic iNKT cells subsets, spleen NK cells, NKT<sub>FH</sub> and  
 950 NKT<sub>eff</sub> from mice injected 6 days earlier with  $\alpha$ GalCer. NFAT1 ChIP-seq analysis of  
 951 CD8<sup>+</sup> T cells with and without PMA/ionomycin stimulation included for comparison<sup>54</sup>.  
 952 Flow cytometry analysis of expression of KLRG1 and CX3CR1 by the indicated  
 953 populations of gated spleen iNKT cells at day 6 after antigen. Quantification on right, n  
 954 = 11 mice ( $\alpha$ GalCer challenged, KLRG1), n = 12 mice ( $\alpha$ GalCer challenged, CXCR3), n  
 955 = 6 mice (unstimulated, KLRG1), n = 8 mice (unstimulated, CXCR3), n = 11-12 mice  
 956 (NKT<sub>FH</sub>). c. Representative flow cytometry analysis of expression of NKT<sub>eff</sub> markers  
 957 CX3CR1 and KLRG1 by gated spleen PD1<sup>-</sup> KLRG1<sup>-</sup> iNKT cells at day 30 or later after  
 958 antigen administration. Quantification of iNKT cells expressing NKT<sub>eff</sub> markers,  
 959 challenged mice analyzed at day 30 or later on right, n = 8 mice ( $\alpha$ GalCer challenged,  
 960 NKT<sub>FH</sub>), n = 7 mice (unstimulated). b,c. Representative data from 3-5 experiments,  
 961 error bars depict SEM, statistical significance assessed via Kruskal-Wallis test.
